1 **Demography and behaviour of polygyne nests of the supercolonial ant**

2 ***Cataglyphis niger*:**

3 **Does kinship matter?**

4

5 Tali Reiner Brodetzki<sup>1</sup>, Guy Brodetzki, Ofer Feinerman<sup>2</sup>, and Abraham Hefetz<sup>1</sup>

6 <sup>1</sup> School of Zoology, George S. Wise Faculty of Life Sciences, Tel Aviv University, Tel  
7 Aviv, 6997801, Israel.

8 <sup>2</sup> Department of Physics of Complex Systems, Weizmann Institute of Science,  
9 Rehovot, 7610001, Israel.

10 Corresponding author: Tali Reiner Brodetzki

11 School of Zoology, George S. Wise Faculty of Life Sciences, Tel Aviv University

12 Tel Aviv, 69978, Israel

13 Phone: + 972 3 6408766

14 e-mail: [talireiner@gmail.com](mailto:talireiner@gmail.com)

15 Running headline: *C. niger* polygyne nest demography and behaviour

16

17 **Abstract**

18 The basic ant colony is presumed to have evolved through kin selection. However,  
19 ants show a remarkable diversity in their social organization, from a monogynous-  
20 monandrous queen to the more derived states of polygyny with polyandrous  
21 queens. The existence of polygyny is an evolutionary enigma, since kin selection  
22 theory predicts that while queens should strive for reproductive monopoly, workers  
23 are predicted to favor their own matriline in rearing gynes. Using a barcoding system  
24 that enables tracking of individual interactions, along with polymorphic DNA  
25 microsatellite markers that indicate the matriline and patriline of all individuals, we  
26 demonstrate the complex social interactions in polygyne nests of *Cataglyphis niger*.  
27 *C. niger* is not only polygyne but also constitutes a supercolony at the study site. Our  
28 pioneering findings that both queens and workers are not necessarily related to each  
29 other support the supercolony structure of the population. Also in line with  
30 supercoloniality, we demonstrate that the workers contribute equally to the nest  
31 production and rearing of the queens. Unlike invasive supercolonial species, *C. niger*  
32 is native to Israel, raising questions about the driving forces, apart from kin selection,  
33 that stabilize this society.

34 **Keywords:** nepotism, social structure, supercolony, QR tracking, kin selection,  
35 polygyne

## 36 Introduction

37 In the Middle Ages, the chastity imposed upon Catholic popes led to an inclusive  
38 fitness behaviour of appointing their nephews as cardinals, who would later succeed  
39 them as popes. This behaviour is known as nepotism. Similarly, monogynous ant  
40 colonies, the postulated basic colony structure, presumably evolved via kin selection  
41 (Hamilton, 1964; Hölldobler and Wilson, 1990; Hughes *et al.*, 2008; Boomsma, 2009).  
42 Notwithstanding, more derived states in which the colony is composed of multiple  
43 queens (polygyny) that may also be multiply inseminated (polyandry), are very  
44 common and present a conflict for the inclusive fitness theory. Polygyny poses two  
45 problems: from the queens' perspective, queens are predicted to compete for  
46 monopoly in reproduction; while from the workers' perspective, workers are  
47 predicted to favor their own matriline in rearing gynes (young unmated queens;  
48 Keller, 1993). The social consequences of polygyny in ant colonies vary, ranging from  
49 an equal reproductive share among queens to functional monogyny (i.e., only one  
50 queen reproduces while all other queens behave like workers); and from complete  
51 openness to incoming queens to a limited acceptance of only related queens  
52 (Hölldobler and Wilson, 1977). Species may exhibit social polymorphism with this  
53 respect, which is mostly believed to be the result of multiple selective pressures such  
54 as ecological constraints on nesting success, predation, and increased genetic  
55 diversity. Social polymorphism is also usually associated with profound changes in  
56 life-history strategies and dispersal behaviour (Bourke and Franks, 1995; Keller,  
57 1995; Pamilo and Crozier, 1996; Ross, 2001; Chapuisat, Bocherens and Rosset, 2004).  
58 Inclusive fitness theory also assumes favorable discrimination of closely-related  
59 individuals (e.g., nepotism), unless between-matriline competition hampers total  
60 colony reproductive output. This discrimination is probably mediated through kin  
61 recognition cues, similar to nestmate recognition cues. Although, recognition cues  
62 exist in ants (Soroker *et al.*, 1994; Lahav *et al.*, 1998) they seem to play a role in  
63 within-colony kin discrimination only in rare cases (El-Showk *et al.*, 2010).  
64 Additionally, in most cases relatedness in these polygyne nests is low thus raising the  
65 question of the benefits of the inclusive fitness theory. Indeed, to date the  
66 occurrence of nepotism in eusocial insects, specifically in ants, has mostly been

67 rejected (DeHeer and Ross, 1997; Holzer *et al.*, 2006; Zinck, Châline and Jaisson,  
68 2009; Friend and Bourke, 2012), except for *Formica fusca* (Hannonen and  
69 Sundström, 2003) but see the criticism by (Holzer *et al.*, 2006; e.g. selective brood  
70 mortality rather than preferential brood rearing), and *Leptothorax acervorum* ants  
71 (Gill and Hammond, 2011). The extent of nepotism in eusocial insects is thus still  
72 unclear and there is a need for actual behavioural assays. Boomsma and d’Ettorre  
73 (2013) suggested that within-colony kin discrimination might be maintained in a  
74 secondary polygyny where there is a high queen turnover and fluctuating  
75 relatedness in the colony.

76 The ant genus *Cataglyphis* comprises over one hundred described species that are  
77 distributed across the Palaearctic region in arid environments (Agosti, 1990).  
78 *Cataglyphis* exhibits a high social polymorphism, from strict monogyny (*C. sabulosa*,  
79 *C. bicolor*, *C. emmae* and *C. hispanica*) through facultative polygyny (*C. velox* and *C.*  
80 *livida*) to polygyny (*C. niger* and *C. mauritanica*; (Lenoir *et al.*, 2009; Boulay *et al.*,  
81 2017). The genus also demonstrates a diversity of reproduction modes (sexual and  
82 asexual), which enables us to investigate the evolution of sociality. It is therefore  
83 highly important to understand the mode of social organization for each species.  
84 Specifically in polygyne nests, it is important to understand the within-nest  
85 interactions since there are multiple possibilities of nest foundation and relatedness  
86 asymmetries (Keller and Reeve, 1995).

87 Here, we focus on a population of *C. niger* that constructs polygyne nests organized  
88 as a supercolony (Leniaud *et al.*, 2011). In such population structure, brood and  
89 workers are often translocated to other nests in the population according to the  
90 changing needs of the widespread colony. This complex social system raises multiple  
91 thoughts about the mechanisms leading to this evolutionary stable status. Nepotism  
92 was investigated and rejected in the imported fire ant, *Solenopsis invicta*, which has  
93 a similar population and social structure in its invasive range (DeHeer and Ross,  
94 1997). However, *C. niger* is a native species, and therefore could behave differently  
95 and possibly demonstrate within-colony kin discrimination more than an invasive  
96 species.

97 Using a barcode system for tracking individual movement, we monitored worker-  
98 worker and workers-queen interactions in polygyne nests. We also genotyped the  
99 workers and queens in order to assess the within-nest relatedness. For the first time,  
100 to the best of our knowledge, we have obtained extensive data on both individual  
101 interactions and relatedness between the tested individuals, revealing the complex  
102 relationships that exist in polygyne nests, and rejecting the possibility of nepotism.

103

## 104 **Methods**

### 105 Ant collection and maintenance

106 Three complete polygyne nests (nests 677, 868, and 869 possessing 3, 3 and 4  
107 queens, respectively) of *C. niger* (*niger* haplotype, as described in Eyer 2017) were  
108 excavated from the Tel-Baruch population in the semi-stabilized sand dunes of Tel  
109 Aviv, Israel. Prior to any manipulation, nests were kept in the lab for about a month  
110 under constant temperature and humidity and provided with water and a diet  
111 according to Bhatkar and Whitcomb (1970), supplemented with tuna fish. For  
112 observations, a subset of randomly selected workers (n=200 for each of the 3 nests)  
113 and the queens were housed in artificial nests (20cm x 30cm) closed with an IR  
114 filtered roof and provided with water and food *ad libitum*. Workers and queens  
115 were each marked with individual 2mm QR barcodes using skin adhesive (SAUER-  
116 HAUTKLEBER, Manfred sauer GMBH). Using a Canon T3i we took snapshots of the  
117 nest every 2 seconds, for 10,000 continuous frames (approximately 5.5 hours). The  
118 following observation protocol was performed for each of the three nests. Three  
119 days after tagging the first session began, constituting free roaming queens and  
120 workers, and lasted for 3 days. In the following session the queens were tethered at  
121 the petiole with fine nylon string (2-3 cm long), restricting each to a limited space in  
122 a different corner of the nest, while allowing free movement of the workers  
123 throughout the nest. At the end of this session the queens were released for three  
124 days, after which a second session of tethered queens began, in which the queens  
125 were placed at different corners from the previous session.

## 126 Statistical analysis

127 Behavioural analyses were performed using BugTag, a barcode analysis system  
128 (developed by *robiotec*). The tags enabled continuous monitoring of the location of  
129 each individual ant. The direction of the tags was aligned to match the position of  
130 the ant's head, indicative of the direction at which it faced. Workers presenting low  
131 detection rates (their identity was certain in less than 30% of the 10,000 frames)  
132 were excluded from the analyses. In cases where missed detections occurred in  
133 segments that were either fewer than five frames (less than 10 second apart), or if  
134 the change in the individual's position before and after the detection gap was less  
135 than 2cm in distance, the position was interpolated using linear regression. Thus, the  
136 numbers of workers in each analysis (2 replicates) were 137 and 122 for nest 677;  
137 149 and 161 for nest 868; and 161 and 159 for nest 869.

138 Using MATLAB, we defined a circular virtual arena (2cm radius) around each queen,  
139 hence termed "retinue space". Workers were considered to engaged in retinue  
140 around the queen if they were positioned in the "retinue space" while facing the  
141 queen for over 10% of the observation time. Ants that only occasionally interacted  
142 with a queen or sporadically shared her roaming space were not considered as  
143 involved in retinue behaviour. The constancy of these groups over time, in terms of  
144 ant identity, and the fidelity of each worker to a specific queen or task were also  
145 measured. A Permutation analysis was used to test the significance of the ants'  
146 positions between the different queens' spaces. During the manipulation, the  
147 queens were shuffled in the nest (tied queen iteration 1 & 2) and the ants  
148 reoccupied retinue positions. Computationally, we define a score for each possible  
149 one-to-one assignment (Heyman *et al.*, 2017), that score takes in to account the  
150 changes in worker position between iteration 1&2. This measure varies between 0  
151 and 1. If it occurs that each ant returned to exactly the same queen's space after the  
152 manipulation (including fraction of time spent) then the actual experimental  
153 assignment will be scored as 1. If ants' retinue other queens or do not retinue at all  
154 the score can be expected to be closer to the minimal value of 0. Thus, this score is  
155 given both to the actual ant assignment as projected by the experiment and the  
156 random permutations of their locations. If the actual score is different than the

157 mean permutation score than the ants are choosing their positions; either to stay  
158 with the same queen or rather choosing to retinue another queen. However if the  
159 real score is no different than the permutation score than ants' retinue is random.

## 160 Genetic analysis

161 At the end of the experiment, all the queens and workers were sacrificed for genetic  
162 analyses. For nest 868 we analyzed the 3 queens and all the 165 workers in the  
163 experimental nest. For the remaining two nests (677 and 869) we analyzed the  
164 queens and a subset of workers (18 and 28, respectively), which included the top  
165 three "retinue" workers for each queen (the minimal number of retinue workers for  
166 all of the queens in all of the sessions) along with randomly selected nestmates.  
167 Queens' ovaries were dissected to assess their degree of activation. Under a  
168 binocular we compared the number of reproductively active ovarioles and the  
169 number and size of oocytes in them, creating an activation index as follows: **0** - non-  
170 activated ovarioles; **1** - 2 to 4 activated ovarioles with slightly developed oocytes; **2** -  
171 4 activated ovarioles with medium oocytes; **3** - all ovarioles with large, ready to lay  
172 eggs). We also kept the spermathecal content of each queen for genetic analyses in  
173 Ringer's buffer at -80°C until DNA extraction. DNA was extracted with 5% CHELEX  
174 (*BIO-RAD*) and amplified with 7 microsatellite markers that had been previously  
175 designed for *C. hispanica* (Ch23 ;Darras, Kuhn and Aron, 2014), *C. cursor* (Cc51, Cc89,  
176 and Cc99;Percy *et al.*, 2004), and *C. niger* (Cn02, Cn04, and Cn08 ;Saar *et al.*, 2014)  
177 using Type-it PCR mix (QIAGEN). PCR products were sequenced by ABI3500 genetic  
178 analyzer and genotype analyses were performed with GeneMarker. Relatedness was  
179 evaluated with Coancestry (Wang, 2011) and ML Relate (Kalinowski, Wagner and  
180 Taper, 2006). We checked for possible correlation of relatedness to the mean  
181 distances between all the individuals in the nest (workers and queens) using  
182 SOCPROG 2.8. Network analysis was done using UCI6 and NetDraw.

## 183 **Results**

### 184 Nests compositions and within-nest relatedness

185 Each experimental nest had 3-4 queens (667- 3; 868- 3; 869-4), all of which were  
186 multiply inseminated by 3-7 males. All the queens in the experiment (n=10) had well  
187 developed ovaries with ready-to-lay eggs (level 3), except for one queen in nest 868  
188 (**Queen 3- tag # 552**) and one queen in nest 869 (Q4- tag # 1189) which had medium-  
189 size oocytes (level 2). Table 1 presents the level of relatedness among the queens in  
190 the experimental nests. In nest 869 three of the four queens were highly related  
191 (Relatedness (R)>0.5; full sisters or daughters), while the 4<sup>th</sup> queen was completely  
192 unrelated (R<0; not different from relatedness=0). In nest 677 two of the queens  
193 were slightly related (0.2181; half sisters or cousins), while the 3<sup>rd</sup> was not related to  
194 either of the other two (R<0.1). All three queens in nest 868 were completely  
195 unrelated (R<0.1).

196 To assess nest demography, we genotyped all the workers and queens from nest 868  
197 that had participated in the tagging experiment (three queens and 165 workers).  
198 Since these workers were randomly selected out of the approximately 1,000 workers  
199 that populated the nest, we assume that they reflect a good assessment of the  
200 genotype distribution within the entire nest. The genotype analysis revealed that  
201 9.6% of the workers were highly related to each other (number of relationships/total  
202 possible relationships of Relatedness value $\geq$ 0.5), 14.8% were moderately related  
203 (0.25 $\leq$ R<0.5), 19.3% had low relatedness (0.125 $\leq$ R<0.25), and 56.3% were  
204 unrelated to any of the other workers in the nest (R<0.125). A network analysis of  
205 relatedness values with ties indicating relatedness greater than 0.25 and nodes sized  
206 according to centrality measures is presented in supplementary Figure S1.

207 Relatedness distribution of the workers to the different queens was as follows:  
208 Highly related workers (R  $\geq$ 0.5, possible daughters or full sisters) **Queen 1**=10.3%,  
209 Q2=9.1% (of which 1 worker was similarly related to both Q1 and Q2), and Q3= 6%.  
210 Moderately related workers (0.25 $\leq$ R<0.5, possible sisters) to the different queens  
211 was Q1=14.5%, Q2=15.8% (of which 4 workers were similarly related to both Q1 and  
212 Q2), and Q3= 2.4%. The remaining 63 workers were not related to any of the three  
213 queens, (R< 0.25). Overall, nest relatedness for nest 868 was 0.058, and average  
214 relatedness of the workers to each of the queens was similar (0.089 $\pm$ 0.004). These



215 results are slightly lower than the within-nest relatedness of  $0.112 \pm 0.009$  of the  
216 entire population (based on 129 workers from 6 nests; data not presented).

217 For nests 677 and 869 we genotyped a subset of workers as presented in Table 2. In  
218 nest 677, 27.7% of the 18 selected workers were highly related to at least one of the  
219 queens (relatedness  $\geq 0.5$ ): Q1=5.5%, Q2= 22.2%, and Q3=0; and 38.9% of the  
220 workers were moderately related ( $0.25 \leq R < 0.5$ , possible sisters): Q1=27.7%,  
221 Q2=5.5% (one worker who was equally related to Q1), and Q3= 11.1%. The  
222 remaining 38.8% of the workers were not related to any of the queens ( $R < 0.25$ ). In  
223 nest 869, 28.6% of the 28 selected workers were highly related to at least one of the  
224 queens ( $R \geq 0.5$ ): Q1=7.1%, Q2=3.6% (one worker who was similarly related to Q1  
225 and Q4), Q3=7.1% (one worker was similarly related to Q4), Q4=17.9%. Moderately  
226 related workers to queens were as follows: Q1= 14.3% (one worker similar to Q4),  
227 Q2= 21.4% (one worker similar to Q3 and one to Q4), Q3= 7.1%, Q4=17.9%. The  
228 remaining 42.9% of the workers were not related to any of the queens.

229

### 230 Identity and genotype of “retinue workers”

231 The first set of experiments was performed in an “open-range” arena where the  
232 queens and workers could roam freely. Figure 1A depicts network analyses of the  
233 mean distances between the individuals in the experimental nest 868. The network  
234 presents only the ties between individuals that were in high proximity to each other  
235 over time (3 days; proximity  $< \text{mean} + 2\text{SD}$ ), individuals that did not have such ties are  
236 represented at the left side of the network. The three queens as well as a small  
237 number of workers were highly central in the network: i.e., they had close  
238 interactions with many individuals. These workers can be considered as ‘retinue  
239 workers’. Queens also tended to stay very close to each other. It is also evident that,  
240 over time, many of the workers did not maintain close proximity to each other (who  
241 are presented in fig. 1A had few or no ties; their proximity to one another was below  
242 2SD). Figure 1B depicts a network of relatedness of the ‘retinue’ workers only with  
243 the queens, demonstrating only ties higher than 0.25 (moderately to highly related).  
244 Queens were not very central with respect to relatedness values, with only a few of

245 their daughters among the retinue workers. Furthermore, the retinue workers who  
246 were central in the proximity network were not very central in the relatedness  
247 network and not highly related to others in the nest. Aligning relatedness results and  
248 mean proximity locations of all the workers and queens revealed no clear correlation  
249 (i.e., neither workers nor queens interacted more with highly related individuals;  
250 Mantel Z test= -0.005, p=0.75).

251 In the “open-range” arena queens tended to be near each other, which made it  
252 difficult to determine precisely which worker was tending to which queen.  
253 Therefore, to assess whether workers preferred specific queens, we spaced out the  
254 queens within the nest by confining each to a specific location in the nest while  
255 allowing workers free movement, and thus enabling them to selectively retinue a  
256 queen. Queens' retinue consisted of  $3.86 \pm 0.15$  ( $\pm$ SE) workers (range of averages 2.8-  
257 4.9 in workers attending a queen throughout the entire session; Fig. S2). There was  
258 no preference over time for a specific queen, although queens with smaller oocytes  
259 tended to have a smaller retinue group, this was not significantly different than the  
260 retinue groups of the other, more fecund, queens.

261 No workers in any nest displayed an apparent preference for a specific queen.  
262 Workers varied in the time they spent interacting with the different queens (Fig. 2A),  
263 but most did not have prolonged interactions. Approximately a quarter of the  
264 workers spent more than 10% of their time in one of the queens' retinue space, with  
265 the maximal proportion of time spent next to a specific queen being 30%. Workers  
266 were rarely loyal to the queens they initially attended, but rather directed their  
267 retinue behaviour towards the other queens (Fig. 2B). Worker switches between  
268 queens occurred both during the same session as well as between the two iteration  
269 sessions. Worker preference for the retinue of a specific queen did not differ from  
270 the random permutations of workers' preferences for the different queens,  
271 permutation scores were almost the same as the actual experimental scores (nest  
272 677: 0.524-0.523; nest 868: 0.495-0.495; nest 869: 0.436-0.404; Fig. 2C shows the  
273 results for nest 868).

274 The relatedness of the top three “retinue” workers (which spent more than 10% of

275 their time in retinue) to the attended queens ranged between -0.29 to 0.54 (Fig. 3),  
276 the average of these are similar to the average relatedness of all of the workers in  
277 the nest to each of the queens, this also demonstrates that the queens' attendants  
278 were not necessarily related to the attended queen.

279

## 280 **Discussion**

281 Interactions between nestmates in an ant colony have been the focus of many  
282 recent studies, all attempting to uncover the mechanisms of 'self- organization', a  
283 hallmark in the evolution of social insects (Pinter-Wollman *et al.*, 2011; Mersch,  
284 Crespi and Keller, 2013; Heyman *et al.*, 2017). Here, for the first time, we combined  
285 individual tracking with genetic data in order to elucidate the possible effects of  
286 relatedness and kin selection on worker in-nest behaviour.

287 Polygyny is still an evolutionary enigma with respect to its adaptive value. Several  
288 explanations have been proposed for the mutual benefits of this social dynamic,  
289 from high relatedness of the co-inhabiting queens (the inclusive fitness explanation;  
290 Giraud *et al.*, 2001) to robustness of the colony (higher genetic diversity, and colony  
291 size explanations; Keller, 1995; Hughes, Ratnieks and Oldroyd, 2008; Heinze and  
292 Rueppell, 2014). In such complex societies in which relatedness varies greatly  
293 between individuals, often reaching that of a non-eusocial non-viscous population,  
294 we would expect to see both altruistic and nepotistic interactions, like those  
295 commonly found in many vertebrate societies (Eberhard, 1975; Clutton-Brock, 2002;  
296 Hatchwell, 2010). Theoretically, nepotistic interactions should be favored unless they  
297 negatively affect the society's overall fitness.

298 Additionally, in the present study, we examined whether relatedness influences the  
299 dynamics of the nest (in terms of worker behaviour) in this specific case in which the  
300 polygyne nests is also organized as a supercolony. As expected from a unicolonial  
301 system, we found that, in *C. niger* both inter- and intra-colony relatedness was very  
302 low; with only about a third of nestmate workers being related to the level of sisters  
303 or half-sisters. It was argued by Helanterä *et al.* 2009, that in order to maintain such

304 a unicolonial structure it is necessary to have nepotism as otherwise there is a  
305 chance of the social structure disintegrating over an evolutionary time scale.  
306 However, we could not detect any indication of nepotism in our system.

307 Relatedness between the queens was also rather variable, ranging from sisters to un-  
308 related co-nesting queens. This suggests that this species exercises a dependent  
309 colony foundation, conforming to the usual practice in polygyne nests (Cronin *et al.*,  
310 2013). Some of the queens return to their natal nests after mating or are transferred  
311 by workers to a new nest (budding; in the case of queens that are highly related),  
312 while other queens (with low relatedness) disperse and join existing nests (this could  
313 also be explained by colony fission). From our observations at the collection site, we  
314 observed only a few newly-mated queens that were digging, presumably attempting  
315 to found a colony independently, and we also located very few nests with a single  
316 queen in them (unpublished data). Dependent colony foundation seems thus to be a  
317 preferred strategy in this population.

318 Our results also verify for the first time, in this specie the existence of a functional  
319 polygynous nest. Assessment of the ovarian status as well as the relatedness  
320 between queens and workers indicated that all the queens had contributed similarly  
321 to the nest population, thus establishing a true functional polygyny. Our finding that  
322 the queens were multiply inseminated further contributes to the low relatedness.  
323 Finally, we observed frequent movement between nests of workers and brood.  
324 While we cannot exclude that this was simply nest relocation, we interpret it here as  
325 free movement of workers, brood, and queens between the nests of the  
326 supercolony, according to changes in the available resources (Robinson, 2014).

327 The queens in our experimental nests were attended by the same number of  
328 workers on average, and also demonstrated similar oocyte development. These  
329 retinue workers comprised only a small proportion of all the workers in the nest  
330 suggesting the existence of a retinue caste, similarly to that found in honey bees  
331 (Seely, 1979), and to the nurses caste described in *Camponotus fellah* (Mersch,  
332 Crespi and Keller, 2013). The retinue workers were not closely related to the queens,  
333 and also apparently attended the different queens at random rather than being loyal

334 to a specific queen. Indeed, worker locations were not significantly different in  
335 comparison to random permutations. A similar finding holds true for the relatedness  
336 between attendants and attendees. Nestmates did not associate more with highly-  
337 related individuals, irrespective of whether they were workers or queens. All these  
338 emphasize the existence of stochastic intra-colony interactions, both with respect to  
339 worker-queen and worker-worker interactions (i.e. the interactions do not differ  
340 from those expected at random), and thus refutes any possibility of nepotistic  
341 behaviour.

342 However, is nepotism such a parsimonious theory in this case? Under nepotism, we  
343 presume an unequal distribution of resources in favor of specific matriline, which  
344 would perturb normal colony development, rendering polygyny evolutionary  
345 unstable. On the other hand, if nepotism is maladaptive, what is the driving force for  
346 workers to keep tending non-kin, and what are the mechanisms (if any) that prevent  
347 the downgrade of non-kin-biased worker behaviour. This evolutionary conflict may  
348 explain why polygynous supercolonies are so rare, and the benefits are mostly short  
349 lived and extinguish along an evolutionary timescale. For this kind of social structure  
350 to maintain stability there should be other, 'hard-wired', mechanisms involved, such  
351 as the 'social chromosome', a non-combining chromosome that exists only in  
352 polygynous populations (Wang *et al.*, 2013; Purcell *et al.*, 2014). Future work should  
353 attempt to elucidate the possible mechanisms that keep these populations stable,  
354 such as worker fixed sterility.

355

### 356 Acknowledgements

357 This project was funded by the Israel Science foundation (ISF grant # 844/13 to AH).  
358 We would like to thank Oded Schor and Yael Heyman for help with designing and  
359 analyzing the tracking methodology. We would also like to thank P.A. Eyer, Margarita  
360 Orlova, and Tovit Simon for help with sample collection and technical assistance.

### 361 Authors' contributions

362 TRB, OF and AH conceived the ideas and designed the methodology; TRB collected  
363 the data; TRB analyzed the genetic data; TRB and GB analyzed the tracking data; TRB

364 and AH led the writing of the manuscript. All authors contributed critically to the  
365 drafts and gave final approval for publication.

366 Data Accessibility

367 Microsatellite genotypes, CSV files of ants' tracking and MATLAB analysis scripts will  
368 be available at: Dryad doi: to be announced after acceptance.

369

370

371

372 Bibliography

- 373 Agosti, D. (1990) 'Review and reclassification of Cataglyphis (Hymenoptera,  
374 Formicidae)', *Journal of Natural history*. Taylor & Francis Group, 24(6), pp. 1457–  
375 1505.
- 376 Bhatkar, A. and Whitcomb, W. H. (1970) 'Artificial diet for rearing various species of  
377 ants', *Florida Entomologist*. JSTOR, pp. 229–232.
- 378 Boomsma, J. J. (2009) 'Lifetime monogamy and the evolution of eusociality',  
379 *Philosophical Transactions of the Royal Society B: Biological Sciences*. The Royal  
380 Society, 364(1533), pp. 3191–3207. doi: 10.1098/rstb.2009.0101.
- 381 Boomsma, J. J. and d'Ettorre, P. (2013) 'Nice to kin and nasty to non-kin: revisiting  
382 Hamilton's early insights on eusociality', *Biology letters*. The Royal Society, 9(6), p.  
383 20130444.
- 384 Boulay, R. *et al.* (2017) 'Social Life in Arid Environments: The Case Study of  
385 *Cataglyphis* Ants', *Annual Review of Entomology*, 62(1), pp. 305–321. doi:  
386 10.1146/annurev-ento-031616-034941.
- 387 Bourke, A. F. G. and Franks, N. R. (1995) *Social evolution in ants*. Princeton, New  
388 Jersey: Princeton University Press.
- 389 Chapuisat, M., Bocherens, S. and Rosset, H. (2004) 'Variable queen number in ant  
390 colonies: no impact on queen turnover, inbreeding, and population genetic  
391 differentiation in the ant *Formica selysi*', *Evolution*, 58(5), pp. 1064–1072.
- 392 Clutton-Brock, T. (2002) 'Breeding together: kin selection and mutualism in  
393 cooperative vertebrates', *Science*. American Association for the Advancement of  
394 Science, 296(5565), pp. 69–72.
- 395 Cronin, A. L. *et al.* (2013) 'Recurrent evolution of dependent colony foundation  
396 across eusocial insects', *Annual Review of Entomology*, 58.
- 397 Darras, H., Kuhn, A. and Aron, S. (2014) 'Genetic determination of female castes in a  
398 hybridogenetic desert ant', *Journal of Evolutionary Biology*. Wiley Online Library,  
399 27(10), pp. 2265–2271. doi: 10.1111/jeb.12470.
- 400 DeHeer, C. J. and Ross, K. G. (1997) 'Lack of detectable nepotism in multiple-queen  
401 colonies of the fire ant *Solenopsis invicta* (Hymenoptera: Formicidae)', *Behavioral  
402 Ecology and Sociobiology*. Springer-Verlag, 40(1), pp. 27–33.
- 403 Eberhard, M. J. W. (1975) 'The evolution of social behavior by kin selection', *The  
404 Quarterly Review of Biology*. Stony Brook Foundation, Inc., 50(1), pp. 1–33.
- 405 El-Showk, S. *et al.* (2010) 'Are you my mother? Kin recognition in the ant *Formica  
406 fusca*', *Journal of evolutionary biology*. Wiley Online Library, 23(2), pp. 397–406.
- 407 Friend, L. A. and Bourke, A. F. G. (2012) 'Absence of Within-Colony Kin Discrimination  
408 in a Multiple-Queen Ant, *Leptothorax acervorum*', *Ethology*. Wiley Online Library,

- 409 118(12), pp. 1182–1190.
- 410 Gill, R. J. and Hammond, R. L. (2011) ‘Workers influence royal reproduction’,  
411 *Proceedings of the Royal Society B: Biological Sciences*, 278(1711), pp. 1524–1531.  
412 doi: 10.1098/rspb.2010.1774.
- 413 Giraud, T. *et al.* (2001) ‘High genetic relatedness among nestmate queens in the  
414 polygynous ponerine ant *Gnamptogenys striatula* in Brazil’, *Behavioral Ecology and*  
415 *Sociobiology*, 49(2–3), pp. 128–134. doi: 10.1007/s002650000284.
- 416 Hamilton, W. D. (1964) ‘The genetical evolution of social behaviour. II’, *Journal of*  
417 *theoretical biology*. Elsevier, 7(1), pp. 17–52.
- 418 Hannonen, M. and Sundström, L. (2003) ‘Sociobiology: Worker nepotism among  
419 polygynous ants’, *Nature*. Nature Publishing Group, 421(6926), p. 910. doi:  
420 10.1038/421910a.
- 421 Hatchwell, B. J. (2010) ‘Cryptic kin selection: kin structure in vertebrate populations  
422 and opportunities for kin-directed cooperation’, *Ethology*. Wiley Online Library,  
423 116(3), pp. 203–216.
- 424 Heinze, J. and Rueppell, O. (2014) ‘The frequency of multi-queen colonies increases  
425 with altitude in a Nearctic ant’, *Ecological Entomology*, 39(4), pp. 527–529. doi:  
426 10.1111/een.12119.
- 427 Helanterä, H. *et al.* (2009) ‘Unicolonial ants: where do they come from, what are  
428 they and where are they going?’, *Trends in Ecology & Evolution*. Elsevier, 24(6), pp.  
429 341–349. doi: 10.1016/j.tree.2009.01.013.
- 430 Heyman, Y. *et al.* (2017) ‘Ants regulate colony spatial organization using multiple  
431 chemical road-signs’, *Nature communications*. Nature Publishing Group, 8, p. 15414.
- 432 Hölldobler, B. and Wilson, E. O. (1977) ‘The number of queens: An important trait in  
433 ant evolution’, *Naturwissenschaften*, 64(1), pp. 8–15. doi: 10.1007/BF00439886.
- 434 Hölldobler, B. and Wilson, E. O. (1990) *The ants*. Harvard University Press.
- 435 Holzer, B. *et al.* (2006) ‘Sham nepotism as a result of intrinsic differences in brood  
436 viability in ants’, *Proceedings of the Royal Society B: Biological Sciences*, 273(1597), p.  
437 2049 LP-2052. doi: 10.1098/rspb.2006.3553.
- 438 Hughes, A. R. *et al.* (2008) ‘Ecological consequences of genetic diversity’, *Ecology*  
439 *Letters*, 11(6), pp. 609–623. doi: 10.1111/j.1461-0248.2008.01179.x.
- 440 Hughes, W. O. H. H., Ratnieks, F. L. W. W. and Oldroyd, B. P. (2008) ‘Multiple  
441 paternity or multiple queens: two routes to greater intracolony genetic diversity in  
442 the eusocial Hymenoptera’, *Journal of evolutionary biology*. Wiley Online Library,  
443 21(4), pp. 1090–1095. doi: 10.1111/j.1420-9101.2008.01532.x.
- 444 Kalinowski, S. T., Wagner, A. P. and Taper, M. L. (2006) ‘ML-Relate: a computer  
445 program for maximum likelihood estimation of relatedness and relationship’,  
446 *Molecular Ecology Resources*. Wiley Online Library, 6(2), pp. 576–579.



- 447 Keller, L. (1993) 'Queen number and sociality in insects'. Oxford University Press  
448 Oxford.
- 449 Keller, L. (1995) 'Social life: the paradox of multiple-queen colonies', *Trends in*  
450 *Ecology & Evolution*. Elsevier Current Trends, 10(9), pp. 355–360. doi:  
451 10.1016/S0169-5347(00)89133-8.
- 452 Keller, L. and Reeve, H. K. (1995) 'Why do females mate with multiple males? The  
453 sexually selected sperm hypothesis', *Advances in the Study of Behaviour*. New York:  
454 Academic Press, 1965-, 24, pp. 291–316.
- 455 Lahav, S. *et al.* (1998) 'Nestmate recognition in the ant *Cataglyphis niger*: Do queens  
456 matter?', *Behavioral Ecology and Sociobiology*, 43(3), pp. 203–212. doi:  
457 10.1007/s002650050482.
- 458 Leniaud, L. *et al.* (2011) 'Multiple mating and supercoloniality in *Cataglyphis* desert  
459 ants', *Biological Journal of the Linnean Society*, 104(4), pp. 866–876. doi:  
460 10.1111/j.1095-8312.2011.01772.x.
- 461 Lenoir, A. *et al.* (2009) 'Cataglyphis desert ants: a good model for evolutionary  
462 biology in Darwin's anniversary year-A review', *Israel Journal of Entomology*, 39, pp.  
463 1–32. Available at: <http://digital.csic.es/handle/10261/65135>.
- 464 Mersch, D. P., Crespi, a. and Keller, L. (2013) 'Tracking Individuals Shows Spatial  
465 Fidelity Is a Key Regulator of Ant Social Organization', *Science*, 340(6136), pp. 1090–  
466 1093. doi: 10.1126/science.1234316.
- 467 Pamilo, P. and Crozier, R. H. (1996) 'Reproductive skew simplified', *Oikos*. JSTOR, pp.  
468 533–535.
- 469 Pearcy, M. *et al.* (2004) 'Characterization of nuclear DNA microsatellite markers in  
470 the ant *Cataglyphis cursor*', *Molecular Ecology Resources*. Wiley Online Library, 4(4),  
471 pp. 642–644.
- 472 Pinter-Wollman, N. *et al.* (2011) 'The effect of individual variation on the structure  
473 and function of interaction networks in harvester ants', *Journal of The Royal Society*  
474 *Interface*, 8(64), pp. 1562–1573. doi: 10.1098/rsif.2011.0059.
- 475 Purcell, J. *et al.* (2014) 'Convergent Genetic Architecture Underlies Social  
476 Organization in Ants', *Current Biology*. Cell Press, 24(22), pp. 2728–2732. doi:  
477 <https://doi.org/10.1016/j.cub.2014.09.071>.
- 478 Robinson, E. J. H. (2014) 'Polydomy: the organisation and adaptive function of  
479 complex nest systems in ants', *Current Opinion in Insect Science*. Elsevier, 5, pp. 37–  
480 43.
- 481 Ross, K. G. (2001) 'Molecular ecology of social behaviour: analyses of breeding  
482 systems and genetic structure', *Molecular Ecology*. Blackwell Science Ltd, 10(2), pp.  
483 265–284.
- 484 Saar, M. *et al.* (2014) 'At the brink of supercoloniality: genetic, behavioral, and

- 485 chemical assessments of population structure of the desert ant *Cataglyphis niger*,  
 486 *Frontiers in Ecology and Evolution*, 2(May), pp. 1–10. doi: 10.3389/fevo.2014.00013.
- 487 Seely, T. D. (1979) ‘Queen substance dispersal by messenger workers in honeybee  
 488 colonies’, *Behavioral Ecology and Sociobiology*. Springer, 5(4), pp. 391–415.
- 489 Soroker, V. *et al.* (1994) ‘The postpharyngeal gland as a “Gestalt” organ for nestmate  
 490 recognition in the ant *Cataglyphis niger*’, *Naturwissenschaften*, 81(11), pp. 510–513.  
 491 doi: 10.1007/BF01132686.
- 492 Wang, J. (2011) ‘COANCESTRY: a program for simulating, estimating and analysing  
 493 relatedness and inbreeding coefficients’, *Molecular ecology resources*. Blackwell  
 494 Publishing Ltd, 11(1), pp. 141–145.
- 495 Wang, J. *et al.* (2013) ‘A Y-like social chromosome causes alternative colony  
 496 organization in fire ants’, *Nature*. Nature Publishing Group, 493(7434), pp. 664–668.  
 497 doi: 10.1038/nature11832.
- 498 Zinck, L., Châline, N. and Jaisson, P. (2009) ‘Absence of nepotism in worker–queen  
 499 care in polygynous colonies of the ant *Ectatomma tuberculatum*’, *Journal of insect  
 500 behavior*. Springer US, 22(3), pp. 196–204.

501

502

503 Table 1: Relatedness values between queens

| <b>Nest - Queen</b> | <b>869 Q2</b> | <b>869 Q3</b> | <b>869 Q4</b> |
|---------------------|---------------|---------------|---------------|
| <b>869 Q1</b>       | 0.5304        | - 0.1901      | 0.5362        |
| <b>869 Q2</b>       | --            | 0.0626        | 0.6122        |
| <b>869 Q3</b>       | --            | --            | - 0.0165      |
|                     | <b>667 Q2</b> | <b>667 Q3</b> | --            |
| <b>667 Q1</b>       | 0.2181        | 0.047         | --            |
| <b>667 Q2</b>       | --            | 0.0794        | --            |
|                     | <b>868 Q2</b> | <b>868 Q3</b> | --            |
| <b>868 Q1</b>       | - 0.1573      | 0.0873        | --            |
| <b>868 Q2</b>       | --            | - 0.3619      | --            |

504

505

| NEST_QUEEN | RELATEDNESS LEVEL   |                |
|------------|---------------------|----------------|
|            | 0.25                | 0.5            |
| 677_Q1     | 6 <sup>12</sup>     | 1              |
| 677_Q2     | 5 <sup>2</sup>      | 4              |
| 677_Q3     | 2 <sup>1</sup>      | 0              |
| 869_Q1     | 6 <sup>12*o</sup>   | 2*             |
| 869_Q2     | 7 <sup>1*o^wy</sup> | 1*             |
| 869_Q3     | 4 <sup>1^w</sup>    | 2 <sup>1</sup> |
| 869_Q4     | 10 <sup>12wy</sup>  | 5 <sup>1</sup> |

506 Table 2: Number of workers that have relatedness values of 0.25/0.5 to any of the  
507 queens. N= 18 for nest 677 and 28 for nest 869. <sup>12\*o^wy</sup> indicate individuals that are  
508 related to both queens.

509

510

511 **Figures:**

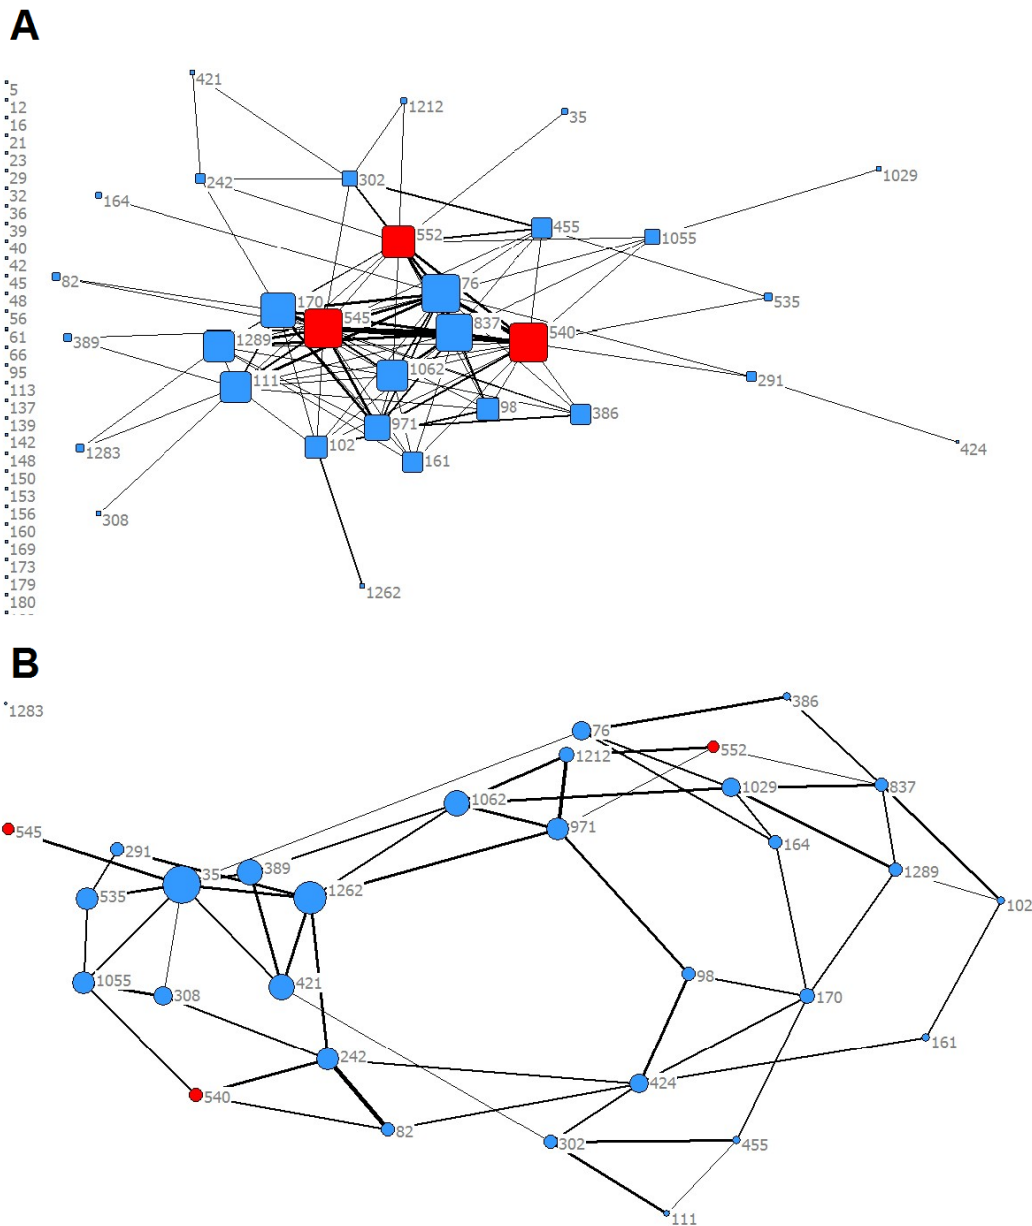

512

513 Figure 1: A) Network analysis of the averaged minimal distance (proximity) between  
514 the ants in nest 868 (threshold of proximity <math>2 \times SD</math>). Queens coloured in red. The size  
515 of the square indicates its centrality (how many relationships it contains). The  
516 thickness of the lines indicate the strength of the tie = average proximity between  
517 individuals. B) Network analysis of relatedness values of the retinue ants in nest 868  
518 showing ties larger than 0.25). Queens coloured in red. The size of the circle  
519 indicates its centrality (how many relationships it contains). The thickness of the line  
520 indicates the strength of the tie = relatedness value between individuals.

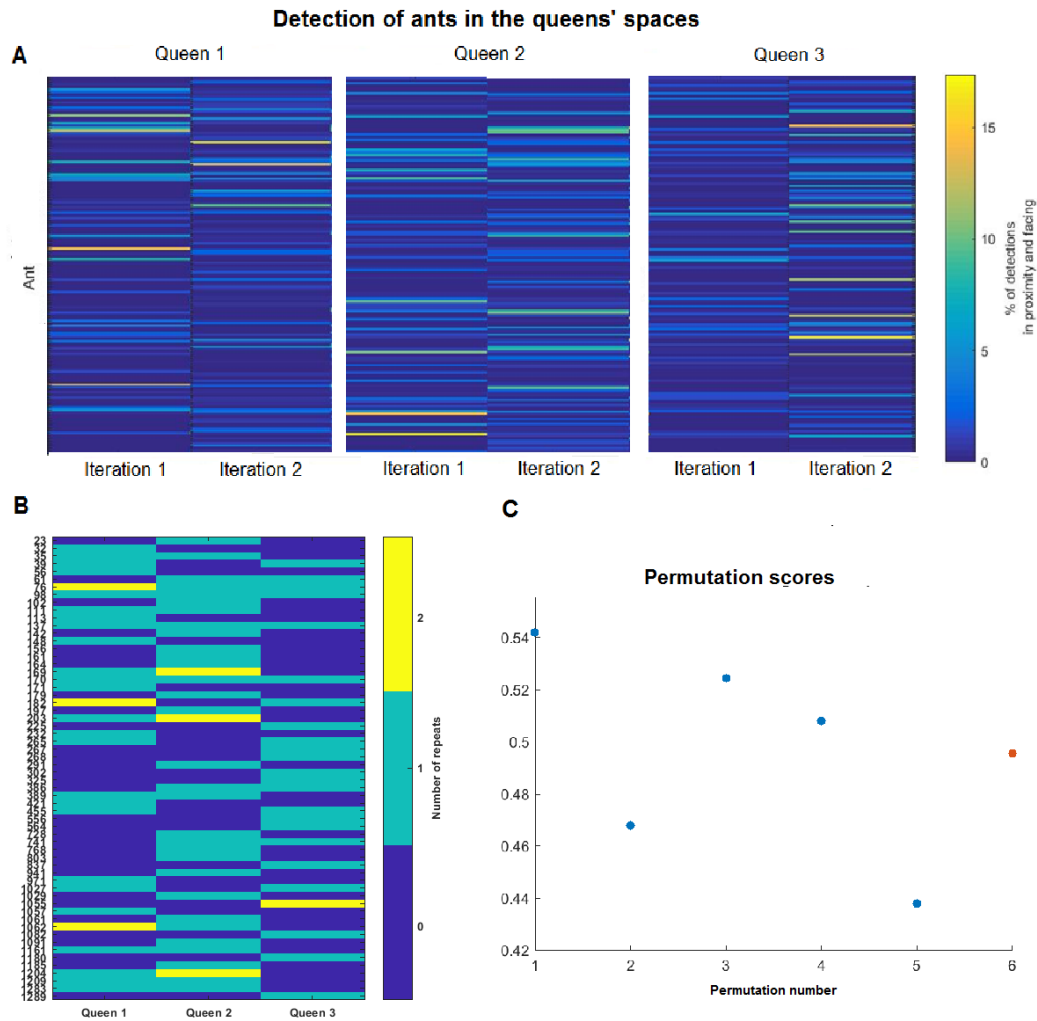

521

522 Figure 2: A) The proportion of time a worker interacted with a specific queen,  
523 normalized to each of the worker's detection success in nest 868. Iterations of  
524 tethered queens were spaced by a period during which they were free. B) Workers  
525 that attended the queens for more than 10% of the time. Dark blue the workers did  
526 not attend a specific queen; light blue they attended the queen for only one repeat  
527 of the experiment; yellow they attended to the queen in both repeats. C)  
528 Permutation scores of 5 permutations for nest 868, in red the actual experimental  
529 score 0.495= mean permutations score.

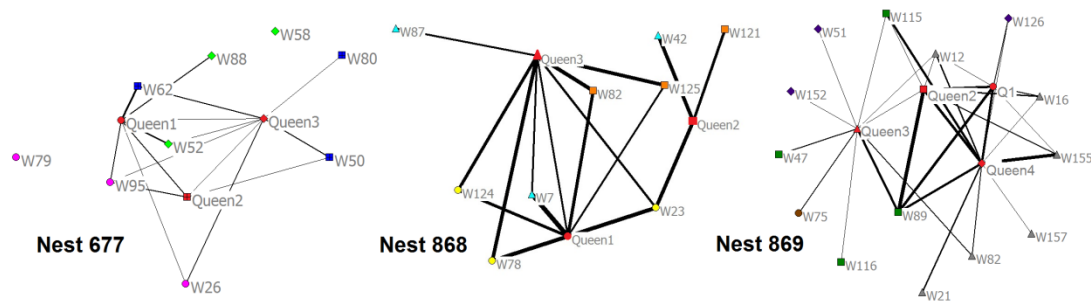

530

531 Figure 3: The level of relatedness between individual ants; line thickness and length  
532 represents the level of relatedness, colour and shape represent the different retinue  
533 groups of the queens, queens coloured in red (W=worker; Q= queen). Queens and  
534 their worker attendants (for each queen three of the workers that spent the most  
535 time next to the queen; relatedness under zero was emitted from the network).

536 Supplementary figures:

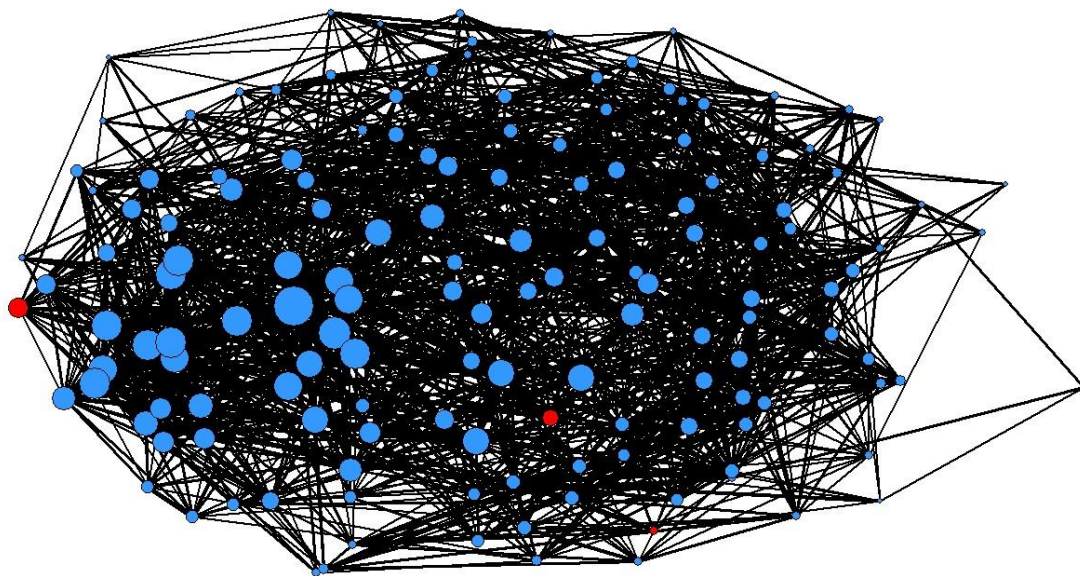

537

538 Figure S1: Network analysis of relatedness values of the ants in nest 868 (with a  
539 threshold of 0.25). Queens coloured in red. The size of the circle indicates its  
540 centrality (how many relationships it contains). The thickness of the line indicates  
541 the strength of the tie = relatedness value between individuals.

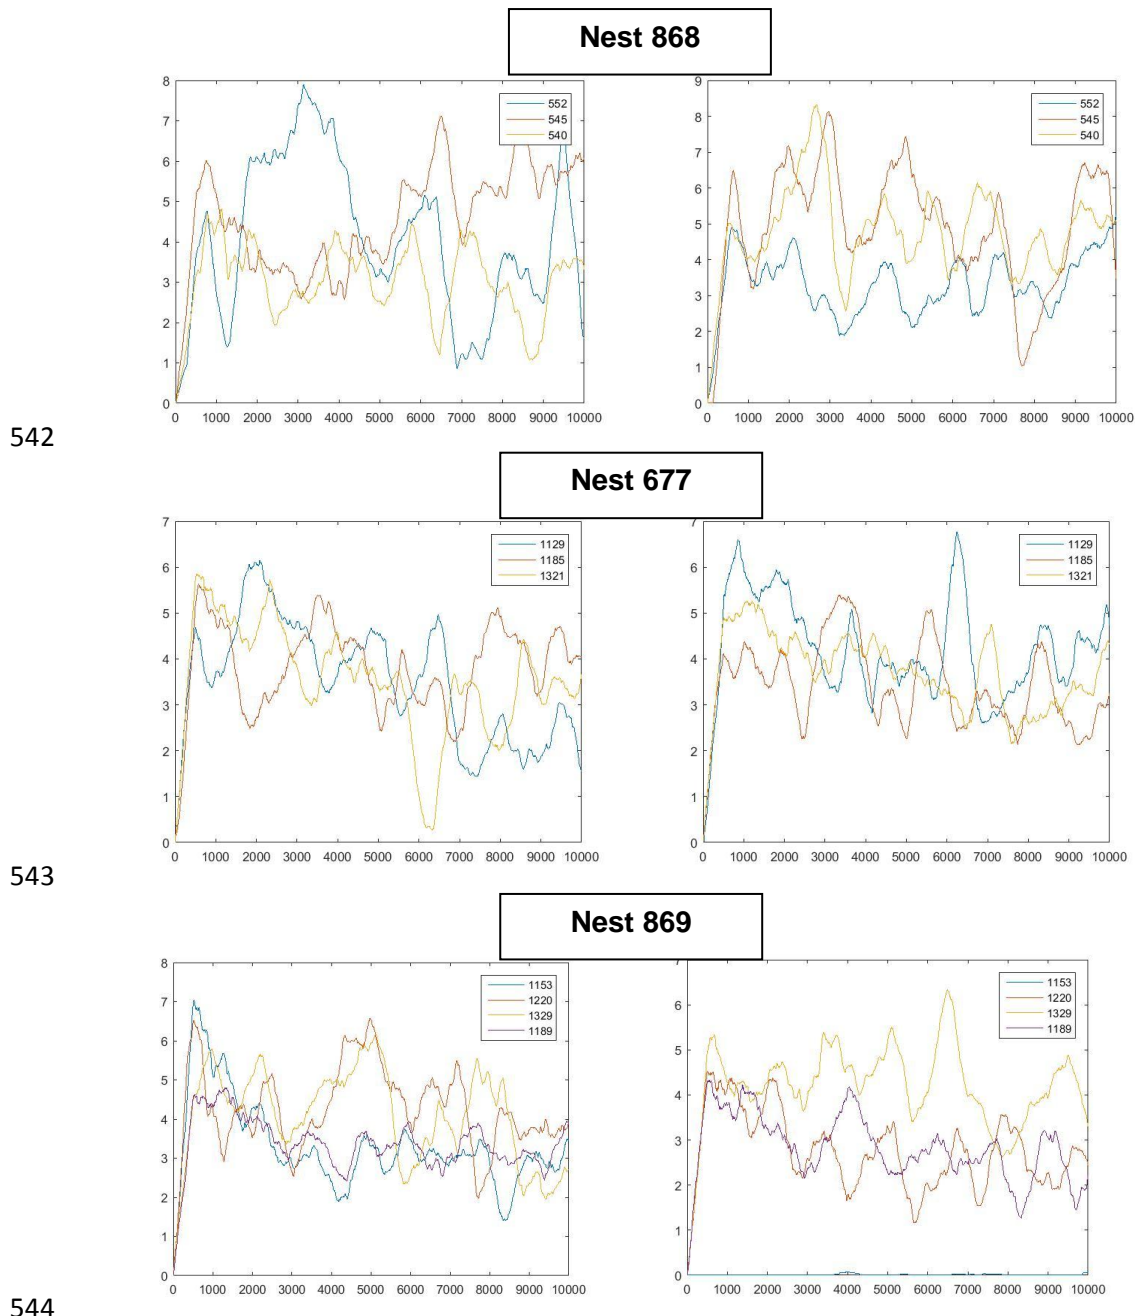

545

546 Figure S2: Assessment of queens' retinue, number of workers around each queen  
547 averaged for 500 frames. Average retinue was 3.86 (SE=0.15; range:2.8-4.9) workers  
548 for each queen. In nest 868; queen 552 in blue had smaller oocytes, in nest 869;  
549 queen 1189 in purple had smaller oocytes.

550

551
